# Supplementary material for: Upregulation of fatty acid synthase in MYC and BCL-2 double-expressor lymphoma
Source: PubMed Central journal article supplement — Oncol Lett. 2021 Feb 2;21(4):245. doi: 10.3892/ol.2021.12506 (PMC7882893; doi:10.3892/ol.2021.12506), 2021-02-02
Supplement: Supplementary_Data.pdf [file Supplementary_Data.pdf]

Figure S1. Silencing of FASN increased cleaved caspase-3 protein in diffuse large B-cell lymphoma cells. Expression of cleaved caspase-3 protein in SU-DHL-2 and U2932 cells transfected with siRNA targeting FASN and non-targeting control for 2 days.  $\beta$ -actin was used as a loading control. siRNA, small interfering RNA; FASN, fatty acid synthase.

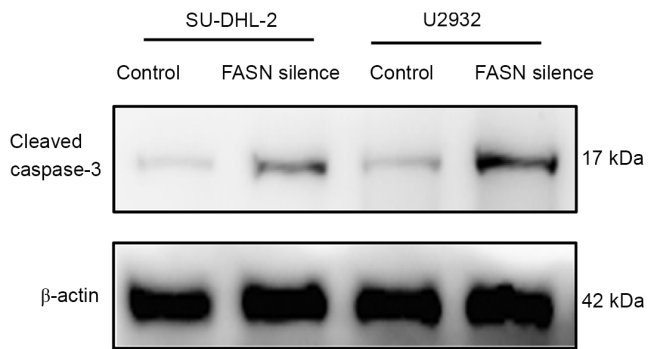

Table SI. Multivariable Cox Regression analysis of ten factors.

---

|                    | P value | HR (95.0% CI)        |
|--------------------|---------|----------------------|
| Ann Arbor stage    | 0.650   | 0.759 (0.23-2.503)   |
| BM involvement +   | 0.559   | 1.381 (0.468-4.078)  |
| CNS involvement +  | 0.214   | 2.403 (0.604-9.568)  |
| Elevated LDH       | 0.020*  | 5.308 (1.302-21.635) |
| B symptom          | 0.366   | 1.684 (0.543-5.222)  |
| MYC+BCL-2+(DEL)    | 0.010*  | 9.998 (1.734-57.658) |
| MYC+               | 0.706   | 0.723 (0.134-3.891)  |
| ENS >2             | 0.643   | 1.466 (0.291-7.388)  |
| IPI score $\geq 3$ | 0.767   | 1.317 (0.213-8.137)  |
| PS score >1        | 0.404   | 1.502 (0.578-3.905)  |

---

We included and analyzed ten factors that had significant differences from univariate analysis(Kaplan-Meier) and performed multivariate analysis(Cox Regression). Results showed that elevated LDH and co-expression of MYC and BCL-2 are independent factors that influences the prognosis and survival.

---
